# Supplementary material for: Assessing Skin Cancer Risk Factors, Sun Safety Behaviors and Melanoma Concern in Atlantic Canada: A Comprehensive Survey Study
Source: MDPI journal article supplement (doi:10.3390/cancers15153753), 2023-07-25
Supplement: s1 [file s1]

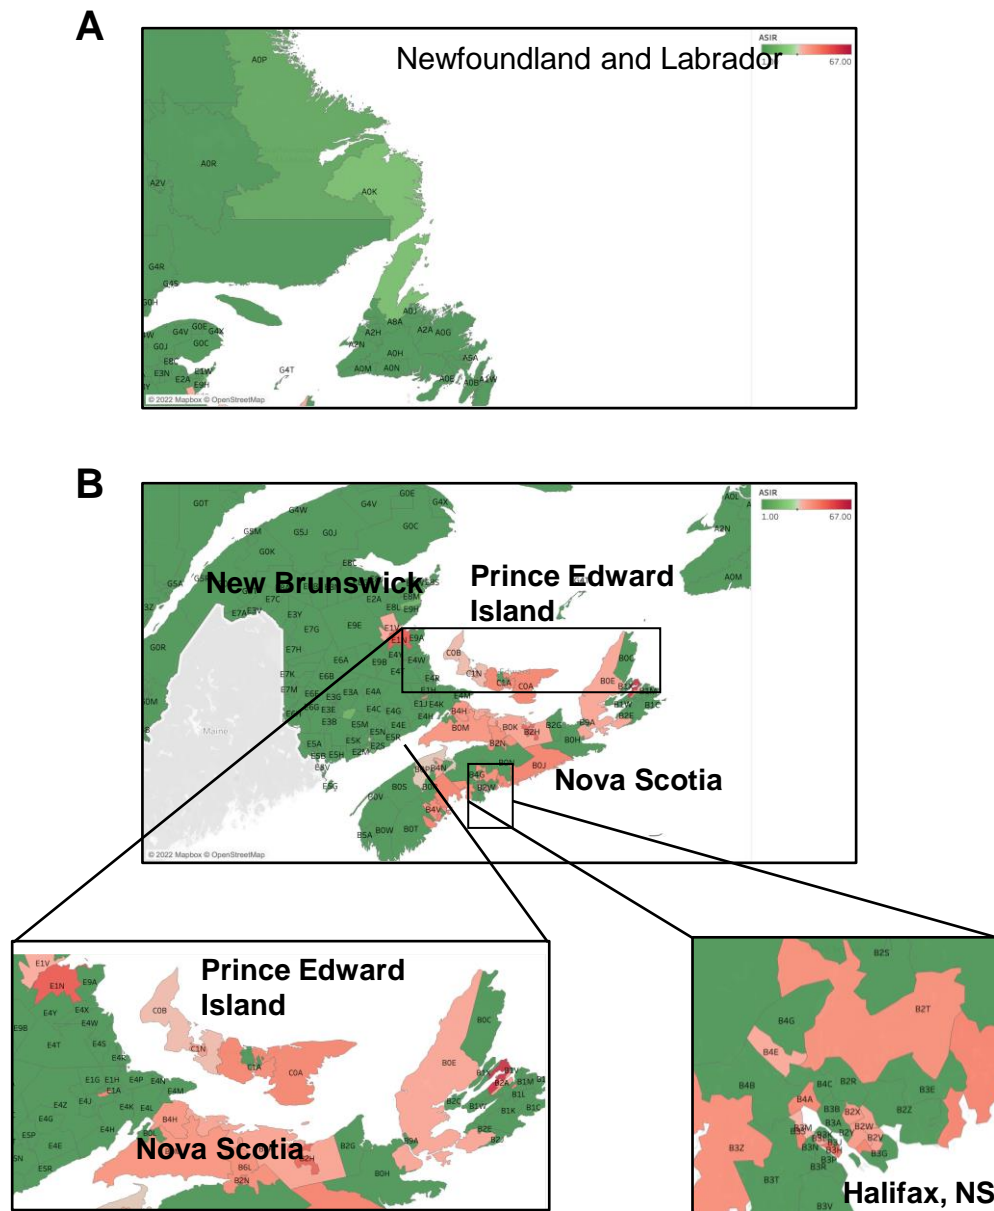

**Figure S1**

Melanoma incidence trends by forward sortation area (FSA—first three entries of a postal code) in Atlantic Canada. Geographic maps illustrate incidence rates for cutaneous melanoma (cases per 100,000 individuals per year) relative to the national average based on the Canadian Cancer Registry/Quebec Cancer Registry databases [21]. 1A: Newfoundland and Labrador 1B: High-incidence FSAs in the Maritime provinces with several high-incidence areas shown in Prince Edward Island, Nova Scotia and New Brunswick.
