# Supplementary material for: Assessing Skin Cancer Risk Factors, Sun Safety Behaviors and Melanoma Concern in Atlantic Canada: A Comprehensive Survey Study
Source: MDPI journal article supplement (doi:10.3390/cancers15153753), 2023-07-25
Supplement: s1 [file s1]

**TABLE S1: POPULATION CHARACTERISTICS**  
\*\*Participants could select more than one answer

| Variable<br>(n, %)                                 | Province | Newfoundland<br>(NL) | Nova Scotia<br>(NS) | New Brunswick<br>(NB) | Prince<br>Edward<br>Island<br>(PEI) | Atlantic<br>Provinces |
|----------------------------------------------------|----------|----------------------|---------------------|-----------------------|-------------------------------------|-----------------------|
|                                                    |          | N= 1048              | N= 4217             | N= 2242               | N= 354                              | N=7861                |
| <i>Age (mean, standard deviation)</i>              |          | 60.0 (9.8)           | 62.4 (9.6)          | 59.9 (10.1)           | 62.2 (9.5)                          | 61.3 (9.8)            |
| <i>Gender (% men)</i>                              |          | 319 (30.4%)          | 1190 (28.2%)        | 613 (27.8%)           | 80 (22.6%)                          | 2202 (28.0%)          |
| <i>Ethnicity**</i> , n (%)                         |          |                      |                     |                       |                                     |                       |
| - Non-Hispanic White or Euro Canadian              |          | 969 (92.5%)          | 4044 (95.9%)        | 2167 (96.7%)          | 340 (96.1%)                         | 7520 (95.7%)          |
| - Afro-Caribbean or African Canadian               |          | 0 (-)                | 19 (0.5%)           | 5 (0.2%)              | 2 (0.6%)                            | 26 (0.3%)             |
| - Latino or Hispanic Canadian                      |          | 2 (0.2%)             | 11 (0.3%)           | 2 (0.1%)              | 0 (-)                               | 15 (0.2%)             |
| - East Asian or Asian Canadian                     |          | 0 (-)                | 12 (0.3%)           | 5 (0.2%)              | 0 (-)                               | 17 (0.2%)             |
| - South Asian or Indian Canadian                   |          | 0 (-)                | 12 (0.3%)           | 6 (0.3%)              | 0 (-)                               | 18 (0.2%)             |
| - Middle Eastern or Arab Canadian                  |          | 5 (0.5%)             | 19 (0.5%)           | 5 (0.2%)              | 2 (0.6%)                            | 31 (0.4%)             |
| - Indigenous                                       |          | 57 (5.4%)            | 59 (1.4%)           | 26 (1.2%)             | 2 (0.6%)                            | 144 (1.8%)            |
| - Other                                            |          | 35 (3.3%)            | 118 (2.8%)          | 58 (2.6%)             | 14 (4.0%)                           | 225 (2.9%)            |
| <i>Income, n (%)</i>                               |          |                      |                     |                       |                                     |                       |
| - < 20 000\$                                       |          | 14 (1.3%)            | 63 (1.5%)           | 29 (1.3%)             | 6 (1.7%)                            | 112 (1.4%)            |
| - 20 000-49 999\$                                  |          | 115 (11.0%)          | 554 (13.1%)         | 252 (11.2%)           | 59 (16.7%)                          | 980 (12.5%)           |
| - 50 000-69 999\$                                  |          | 174 (16.6%)          | 707 (16.8%)         | 361 (16.1%)           | 72 (20.3%)                          | 1314 (16.7%)          |
| - 70 000-89 999\$                                  |          | 152 (14.5%)          | 692 (16.4%)         | 357 (15.9%)           | 38 (10.7%)                          | 1239 (15.8%)          |
| - ≥90,000\$                                        |          | 396 (37.8%)          | 1435 (34.0%)        | 780 (34.8%)           | 113 (31.9%)                         | 2724 (34.7%)          |
| <i>Highest level of education completed, n (%)</i> |          |                      |                     |                       |                                     |                       |
| - No high school                                   |          | 6 (0.6%)             | 46 (1.1%)           | 27 (1.2%)             | 2 (0.6%)                            | 81 (1.0%)             |
| - High school                                      |          | 119 (11.4%)          | 615 (14.6%)         | 300 (13.4%)           | 56 (15.8%)                          | 1090 (13.9%)          |
| - Cegep or college degree                          |          | 386 (36.9%)          | 1141 (27.1%)        | 650 (29.0%)           | 118 (33.3%)                         | 2295 (29.2%)          |
| - University Bachelor's degree                     |          | 292 (27.9%)          | 1279 (30.4%)        | 739 (33.0%)           | 112 (31.6%)                         | 2422 (30.8%)          |
| - Graduate or doctoral studies                     |          | 219 (20.9%)          | 1052 (25.0%)        | 490 (21.9%)           | 61 (17.2%)                          | 1822 (23.2%)          |
| <i>Eye colour, n (%)</i>                           |          |                      |                     |                       |                                     |                       |
| - Brown                                            |          | 259 (24.7%)          | 960 (22.8%)         | 525 (23.4%)           | 69 (19.5%)                          | 1813 (23.1%)          |
| - Blue, green, or grey                             |          | 619 (59.1%)          | 2343 (55.6%)        | 1258 (56.1%)          | 197 (55.7%)                         | 4417 (56.2%)          |
| - Hazel (brownish green)                           |          | 170 (16.2%)          | 914 (21.7%)         | 459 (20.5%)           | 88 (24.9%)                          | 1631 (20.8%)          |
| <i>Fitzpatrick, n (%)</i>                          |          |                      |                     |                       |                                     |                       |
| - Type I                                           |          | 111 (10.6%)          | 348 (8.3%)          | 179 (8.0%)            | 31 (8.8%)                           | 669 (8.5%)            |
| - Type II                                          |          | 294 (28.1%)          | 1318 (31.3%)        | 685 (30.6%)           | 107 (30.2%)                         | 2404 (30.6%)          |
| - Type III                                         |          | 457 (43.6%)          | 1802 (42.7%)        | 991 (44.2%)           | 150 (42.4%)                         | 3400 (43.3%)          |
| - Type IV                                          |          | 153 (14.6%)          | 632 (15.0%)         | 331 (14.8%)           | 55 (15.5%)                          | 1171 (14.9%)          |
| - Type V                                           |          | 21 (2.0%)            | 90 (2.1%)           | 48 (2.1%)             | 6 (1.7%)                            | 165 (2.1%)            |
| - Type VI                                          |          | 2 (0.2%)             | 3 (0.1%)            | 2 (0.1%)              | 1 (0.3%)                            | 8 (0.1%)              |

TABLE S2: UV EXPOSURE, MELANOMA RISK FACTORS AND SUN PROTECTION

| Variable<br>(n, %)                                            | Province | Newfoundland<br>(NL) | Nova Scotia<br>(NS) | New Brunswick<br>(NB) | Prince<br>Edward<br>Island<br>(PEI) | Atlantic<br>Provinces |
|---------------------------------------------------------------|----------|----------------------|---------------------|-----------------------|-------------------------------------|-----------------------|
|                                                               |          | N= 1048              | N= 4217             | N= 2242               | N= 354                              | N=7861                |
| <b>Personal history of skin cancer, <i>n</i> (%)</b>          |          | 107 (10.2%)          | 605 (14.4%)         | 288 (12.9%)           | 36 (10.2%)                          | 1036 (13.2%)          |
| - Melanoma                                                    |          | 31 (29.0%)           | 175 (28.9%)         | 84 (29.2%)            | 12 (33.3%)                          | 302 (29.2%)           |
| - Squamous Cell Carcinoma (SCC)                               |          | 12 (11.2%)           | 79 (13.1%)          | 32 (11.1%)            | 7 (19.4%)                           | 130 (12.6%)           |
| - Basal Cell Carcinoma (BCC)                                  |          | 57 (53.3%)           | 289 (47.8%)         | 130 (45.1%)           | 17 (47.2%)                          | 493 (47.6%)           |
| <b>Family history of skin cancer, <i>n</i> (%)</b>            |          | 318 (30.3%)          | 1427 (33.8%)        | 699 (31.2%)           | 104 (29.4%)                         | 2548 (32.4%)          |
| <b>Lifetime sunburns (more than 10), <i>n</i> (%)</b>         |          | 572 (54.6%)          | 2843 (67.2%)        | 1509 (67.3%)          | 239 (67.5%)                         | 5154 (65.6%)          |
| <b>Lifetime blistering sunburns (1 or more), <i>n</i> (%)</b> |          | 751 (71.7%)          | 3007 (71.3%)        | 1561 (69.6%)          | 253 (71.5%)                         | 5572 (70.9%)          |
| <b>Tanning bed use (more than 1), <i>n</i> (%)</b>            |          | 555 (53.0%)          | 1940 (46.0%)        | 1046 (46.7%)          | 176 (49.7%)                         | 3717 (47.3%)          |
| <b>Sun exposure (high-very high), <i>n</i> (%)</b>            |          |                      |                     |                       |                                     |                       |
| - Total sun exposure                                          |          | 130 (12.4%)          | 935 (22.2%)         | 468 (20.9%)           | 79 (22.3%)                          | 1612 (20.5%)          |
| - Recreational sun exposure                                   |          | 148 (14.1%)          | 1005 (23.8%)        | 550 (24.5%)           | 74 (20.9%)                          | 1777 (22.6%)          |
| - Occupational sun exposure                                   |          | 29 (2.8%)            | 148 (3.5%)          | 82 (3.7%)             | 19 (5.4%)                           | 278 (3.5%)            |
| <b>Tan in the last 12 months, <i>n</i> (%)</b>                |          | 679 (64.8%)          | 3157 (74.9%)        | 1705 (76.1%)          | 278 (78.5%)                         | 5819 (74.0%)          |
| <b>Sun protection (often-always), <i>n</i> (%)</b>            |          |                      |                     |                       |                                     |                       |
| - Sunscreen use                                               |          | 462 (44.1%)          | 2013 (47.7%)        | 998 (44.5%)           | 177 (50.0%)                         | 3650 (46.4%)          |
| - Long sleeve use                                             |          | 629 (60.0%)          | 2705 (64.2%)        | 1355 (60.4%)          | 214 (60.5%)                         | 4903 (62.4%)          |
| - Hat use                                                     |          | 309 (29.5%)          | 1519 (36.0%)        | 720 (32.1%)           | 146 (41.2%)                         | 2694 (34.3%)          |
| - Shade use                                                   |          | 301 (28.7%)          | 1670 (39.6%)        | 875 (39.0%)           | 135 (38.1%)                         | 2981 (37.9%)          |
| - Sunglasses use                                              |          | 779 (74.3%)          | 2955 (70.1%)        | 1606 (71.6%)          | 242 (68.4%)                         | 5582 (71.0%)          |
| <b>Sunscreen type, <i>n</i> (%)</b>                           |          |                      |                     |                       |                                     |                       |
| - Broad-spectrum                                              |          | 684 (65.3%)          | 2811 (66.7%)        | 1492 (66.6%)          | 242 (68.4%)                         | 5229 (66.5%)          |
| - SPF >30                                                     |          | 818 (78.1%)          | 3364 (79.8%)        | 1791 (79.9%)          | 278 (78.5%)                         | 6251 (79.5%)          |

TABLE S3: LEVEL OF WORRY

| Variable<br>(n, %)<br>Province                                                                                                                        | Newfoundland<br>(NL)<br><br>N= 1048         | Nova Scotia<br>(NS)<br><br>N= 4217           | New Brunswick<br>(NB)<br><br>N= 2242         | Prince<br>Edward<br>Island<br>(PEI)<br><br>N= 354 | Atlantic<br>Provinces<br><br>N=7861          |
|-------------------------------------------------------------------------------------------------------------------------------------------------------|---------------------------------------------|----------------------------------------------|----------------------------------------------|---------------------------------------------------|----------------------------------------------|
| Skin Check, <i>n</i> (%)                                                                                                                              | 854 (81.5%)                                 | 3613 (85.7%)                                 | 1807 (80.6%)                                 | 289 (81.6%)                                       | 6563 (83.5%)                                 |
| Reaction, <i>n</i> (%) <ul style="list-style-type: none"><li>- Family doctor visit</li><li>- Check by friend/family member</li><li>- Ignore</li></ul> | 467 (44.6%)<br>421 (40.2%)<br>47 (4.5%)     | 1620 (38.4%)<br>2026 (48.0%)<br>183 (4.3%)   | 865 (38.6%)<br>1037 (46.3%)<br>96 (4.3%)     | 146 (41.2%)<br>173 (48.9%)<br>9 (2.5%)            | 3098 (39.4%)<br>3657 (46.5%)<br>335 (4.3%)   |
| Worry if mole, <i>n</i> (%) <ul style="list-style-type: none"><li>- is irregular in shape</li><li>- changes colour</li><li>- grew in size</li></ul>   | 997 (95.1%)<br>1022 (97.5%)<br>1025 (97.8%) | 4057 (96.2%)<br>4104 (97.3%)<br>4112 (97.5%) | 2167 (96.7%)<br>2197 (98.0%)<br>2190 (97.7%) | 348 (98.3%)<br>351 (99.2%)<br>348 (98.3%)         | 7569 (96.3%)<br>7674 (97.6%)<br>7675 (97.6%) |

TABLE S4: MELANOMA KNOWLEDGE - QUOTES

| <div>Quotes<br/>(n, %)</div> <div>Province</div>                                                                                                             | Newfoundland<br>(NL)<br>Low Incidence<br><br>N= 1048 | Nova Scotia<br>(NS)<br><br>N= 4217 | New Brunswick<br>(NB)<br><br>N= 2242 | Prince<br>Edward<br>Island<br>(PEI)<br><br>N= 354 | Atlantic<br>Provinces<br><br>N=7861 | High Incidence<br>(PEI/NS)<br><br>N= 4571 |
|--------------------------------------------------------------------------------------------------------------------------------------------------------------|------------------------------------------------------|------------------------------------|--------------------------------------|---------------------------------------------------|-------------------------------------|-------------------------------------------|
| <b>Having a base tan is protective against the sun's UV/radiation/skin damage, <i>n</i> (%)</b> <div><div>- Agree</div><div>- Strongly Agree</div></div>     | 136 (13.0%)<br>16 (1.5%)                             | 627 (14.9%)<br>43 (1.0%)           | 305 (13.6%)<br>24 (1.1%)             | 58 (16.4%)<br>5 (1.4%)                            | 1126 (14.3%)<br>88 (1.1%)           | 685 (15.0%)<br>48 (1.1%)                  |
| <b>It is rare to get melanoma before the age of 35, <i>n</i> (%)</b> <div><div>- Agree</div><div>- Strongly Agree</div></div>                                | 106 (10.1%)<br>9 (0.9%)                              | 443 (10.5%)<br>40 (1.0%)           | 225 (10.0%)<br>17 (0.8%)             | 36 (10.2%)<br>1 (0.3%)                            | 810 (10.3%)<br>67 (0.9%)            | 479 (10.5%)<br>41 (0.9%)                  |
| <b>I check my skin on a regular basis for abnormal moles, <i>n</i> (%)</b> <div><div>- Agree</div><div>- Strongly Agree</div></div>                          | 556 (53.1%)<br>169 (16.1%)                           | 2321 (55.0%)<br>706 (16.7%)        | 1195 (53.3%)<br>339 (15.1%)          | 177 (50.0%)<br>63 (17.8%)                         | 4294 (54.1%)<br>1277 (16.2%)        | 2498 (54.7%)<br>769 (16.8%)               |
| <b>Sunscreens pollute the oceans, <i>n</i> (%)</b> <div><div>- Agree</div><div>- Strongly Agree</div></div>                                                  | 118 (11.3%)<br>19 (1.8%)                             | 918 (21.8%)<br>195 (4.6%)          | 387 (17.3%)<br>96 (4.3%)             | 73 (20.6%)<br>11 (3.1%)                           | 1496 (19.0%)<br>321 (4.1%)          | 991 (21.7%)<br>206 (4.5%)                 |
| <b>Sunscreens contain toxic ingredients, <i>n</i> (%)</b> <div><div>- Agree</div><div>- Strongly Agree</div></div>                                           | 107 (10.2%)<br>14 (1.3%)                             | 734 (17.4%)<br>134 (3.2%)          | 386 (17.2%)<br>81 (3.6%)             | 68 (19.2%)<br>14 (4.0%)                           | 1295 (16.5%)<br>243 (3.1%)          | 802 (17.6%)<br>148 (3.2%)                 |
| <b>I look better/healthier with a tan, <i>n</i> (%)</b> <div><div>- Agree</div><div>- Strongly Agree</div></div>                                             | 466 (44.5%)<br>77 (7.4%)                             | 1947 (46.2%)<br>230 (5.5%)         | 1035 (46.2%)<br>120 (5.4%)           | 175 (49.4%)<br>9 (2.5%)                           | 3623 (46.1%)<br>436 (5.6%)          | 2122 (46.4%)<br>239 (5.2%)                |
| <b>Tanning booths are a safer, more controlled way to get a tan than from the sun, <i>n</i> (%)</b> <div><div>- Agree</div><div>- Strongly Agree</div></div> | 11 (1.1%)<br>16 (1.5%)                               | 63 (1.5%)<br>47 (1.1%)             | 31 (1.4%)<br>23 (1.0%)               | 4 (1.1%)<br>5 (1.4%)                              | 109 (1.4%)<br>91 (1.2%)             | 67 (1.5%)<br>52 (1.1%)                    |

**TABLE S5: DIFFERENCE BETWEEN HIGH AND LOW INCIDENCE REGIONS.**

| Variable (n, %)                                   | High Incidence (PEI/NS)<br>N=4571 | Low Incidence (NL)<br>N=1048 | Difference**<br>(95% CI) | Odds Ratio<br>(95% CI) | Adjusted Odds Ratio+<br>(95% CI) | P-value of Adjusted<br>Odds Ratio |
|---------------------------------------------------|-----------------------------------|------------------------------|--------------------------|------------------------|----------------------------------|-----------------------------------|
| <b>Personal history of skin cancer</b>            | 641 (14.0%)                       | 107 (10.2%)                  | 3.8% (1.7%-5.9%)         | 1.4 (1.2-1.8)          | 1.28 (1.02-1.60) *               | 0.03                              |
| - Melanoma                                        | 187 (29.2%)                       | 31 (29.0%)                   | 0.2% (-9.1%-9.5%)        | 1.0 (0.6-1.6)          |                                  |                                   |
| - Squamous Cell Carcinoma                         | 86 (13.4%)                        | 12 (11.2%)                   | 2.2% (-4.3%-8.7%)        | 1.2 (0.6-2.6)          |                                  |                                   |
| - Basal Cell Carcinoma                            | 306 (47.7%)                       | 57 (53.3%)                   | -5.5% (-15.7%-4.7%)      | 0.8 (0.5-1.2)          |                                  |                                   |
| <b>Family history of skin cancer</b>              | 1531 (33.5%)                      | 318 (30.3%)                  | 3.2% (0.1%-6.3%)         | 1.2 (1.0-1.3)          | 1.16 (1.00-1.34)                 | 0.05                              |
| <b>Lifetime sunburns (more than 10)</b>           | 3073 (67.2%)                      | 572 (54.6%)                  | 12.6% (9.3%-16.0%)       | 1.7 (1.5-2.0)          | 2.00 (1.72 – 2.31) *             | <0.001                            |
| <b>Lifetime blistering sunburns (more than 1)</b> | 3260 (71.3%)                      | 751 (71.7%)                  | -0.3% (-3.3%-2.7%)       | 0.9 (0.8-1.1)          | 0.95 (0.81-1.12)                 | 0.58                              |
| <b>Tanning bed use (more than 1)</b>              | 2116 (46.3%)                      | 555 (53.0%)                  | -6.7% (-10.0% - -3.3%)   | 0.8 (0.7-0.9)          | 0.82 (0.71-0.95) *               | 0.008                             |
| <b>Sun exposure (high-very high)</b>              |                                   |                              |                          |                        |                                  |                                   |
| - Total sun exposure                              | 1014 (22.2%)                      | 130 (12.4%)                  | 9.8% (7.4%-12.1%)        | 2.0 (1.7-2.5)          | 2.05 (1.68-2.50) *               | <0.001                            |
| - Recreational sun exposure                       | 1079 (23.6%)                      | 148 (14.1%)                  | 9.5% (7.0%-11.9%)        | 1.9 (1.6-2.3)          | 1.95 (1.61-2.35) *               | <0.001                            |
| - Occupational sun exposure                       | 167 (3.7%)                        | 29 (2.8%)                    | 0.9% (-0.2%-2.0%)        | 1.3 (0.9-2.1)          | 1.47 (0.98-2.21)                 | 0.06                              |
| <b>Tan in the last 12 months</b>                  | 3435 (75.2%)                      | 679 (64.8%)                  | 10.4% (7.2%-13.5%)       | 1.6 (1.4-1.9)          | 1.77 (1.53-2.05) *               | <0.001                            |
| <b>Sun protection (often-always)</b>              |                                   |                              |                          |                        |                                  |                                   |
| - Sunscreen use                                   | 2190 (47.9%)                      | 462 (44.1%)                  | 3.8% (0.5%-7.2%)         | 1.2 (1.0-1.3)          | 1.20 (1.04-1.37) *               | 0.01                              |
| - Long sleeve use                                 | 2919 (63.9%)                      | 629 (60.0%)                  | 3.8% (0.6% - 7.1%)       | 1.2 (1.0-1.4)          | 1.18 (1.02-1.36) *               | 0.02                              |
| - Hat use                                         | 1665 (36.4%)                      | 309 (29.5%)                  | 6.9% (3.8%-10.0%)        | 1.4 (1.2-1.6)          | 1.29 (1.11-1.49) *               | 0.001                             |
| - Shade use                                       | 1805 (39.5%)                      | 301 (28.7%)                  | 10.8% (7.7%-13.9%)       | 1.6 (1.4-1.9)          | 1.51 (1.30-1.75) *               | <0.001                            |
| - Sunglasses use                                  | 3197 (69.9%)                      | 779 (74.3%)                  | 21.2% (18.8%-23.6%)      | 0.8 (0.7-0.9)          | 0.79 (0.67-0.92) *               | 0.002                             |
| <b>Sunscreen type</b>                             |                                   |                              |                          |                        |                                  |                                   |
| - Broad-spectrum                                  | 3053 (66.8%)                      | 684 (65.3%)                  | 1.5% (-1.7%-4.7%)        | 1.1 (0.9-1.2)          | 2.54 (1.32-4.89) *               | 0.005                             |
| - SPF >30                                         | 3642 (79.7%)                      | 818 (78.1%)                  | 1.6% (-1.1%-4.4%)        | 1.1 (0.9-1.3)          | 1.02 (0.81-1.29)                 | 0.85                              |
| <b>Skin Check</b>                                 | 3902 (85.4%)                      | 854 (81.5%)                  | 3.9% (1.3%-6.4%)         | 1.3 (1.1-1.6)          | 1.26 (1.06-1.51) *               | 0.01                              |
| <b>Reaction</b>                                   |                                   |                              |                          |                        |                                  |                                   |
| - Family doctor visit                             | 1766 (38.6%)                      | 467 (44.6%)                  | -5.9% (-9.3% - -2.6%)    | 0.8 (0.7-0.9)          | 0.69 (0.60-0.79) *               | <0.001                            |
| - Check by friend/family member                   | 2199 (48.1%)                      | 421 (40.2%)                  | 7.9% (4.6%-11.2%)        | 1.4 (1.2-1.6)          | 1.44 (1.25-1.66) *               | <0.001                            |
| - Ignore                                          | 192 (4.2%)                        | 47 (4.5%)                    | -0.3% (-1.7%-1.1%)       | 0.9 (0.7-1.3)          | 0.93 (0.67-1.30)                 | 0.69                              |
| <b>Worry if mole</b>                              |                                   |                              |                          |                        |                                  |                                   |
| - is irregular in shape                           | 4405 (96.4%)                      | 997 (95.1%)                  | 1.2% (-0.2%-2.6%)        | 1.4 (1.0-1.9)          | 1.09 (0.65-1.82)                 | 0.75                              |
| - changes colour                                  | 4455 (97.5%)                      | 1022 (97.5%)                 | -0.06% (-1.1%-1.0%)      | 1.0 (0.6-1.5)          | 0.79 (0.39-1.63)                 | 0.53                              |
| - grew in size                                    | 4460 (97.6%)                      | 1025 (97.8%)                 | -0.2% (-1.2%-0.8%)       | 0.9 (0.5-1.4)          | 0.73 (0.37-1.45)                 | 0.37                              |

\*Statistically significant

\*\*Percent difference between high incidence and low incidence provinces

+Gender and age-adjusted odds ratios

**TABLE S6: DIFFERENCE IN PROPORTIONS BETWEEN POPULATIONS WITH DIFFERENT INCOME RANGES.**

| Variable (n,%)                                    | Income > 50K<br>N=5277 | Income < 50K<br>N=1092 | Difference<br>(95% CI, p-value) | Odds Ratio<br>(95% CI) | Adjusted Odds Ratio<br>(95% CI) | P-value of Adjusted<br>Odds Ratio |
|---------------------------------------------------|------------------------|------------------------|---------------------------------|------------------------|---------------------------------|-----------------------------------|
| <b>Personal history of skin cancer</b>            | 670 (12.7%)            | 149 (13.6%)            | -0.9% (-3.2%-1.3%)              | 0.9 (0.8-1.1)          | 1.21 (0.99-1.48)                | 0.06                              |
| - Melanoma                                        | 195 (29.1%)            | 42 (28.2%)             | 0.9% (-7.1%-8.9%)               | 1.0 (0.7-1.6)          |                                 |                                   |
| - Squamous Cell Carcinoma                         | 84 (12.5%)             | 16 (10.7%)             | 1.8% (-3.8%-7.4%)               | 1.2 (0.7-2.3)          |                                 |                                   |
| - Basal Cell Carcinoma                            | 323 (48.2%)            | 72 (48.3%)             | -0.1% (-9.0%-8.8%)              | 1.0 (0.7-1.4)          |                                 |                                   |
| <b>Family history of skin cancer</b>              | 1706 (32.3%)           | 360 (33.0%)            | -0.6% (-3.7%-2.4%)              | 1.0 (0.8-1.1)          | 1.04 (0.90-1.21)                | 0.57                              |
| <b>Lifetime sunburns (more than 10)</b>           | 3656 (69.3%)           | 641 (58.7%)            | 10.6% (7.4%-13.8%)              | 1.6 (1.4-1.8)          | 1.33 (1.15-1.54) *              | <0.001                            |
| <b>Lifetime blistering sunburns (more than 1)</b> | 3813 (72.3%)           | 763 (69.9%)            | 2.4% (-0.6% - 5.4%)             | 1.1 (1.0-1.3)          | 1.06 (0.91-1.24)                | 0.47                              |
| <b>Tanning bed use (more than 1)</b>              | 2603 (49.3%)           | 413 (37.8%)            | 11.5% (8.3%-14.7%)              | 1.6 (1.4-1.8)          | 1.37 (1.19-1.59) *              | <0.001                            |
| <b>Sun exposure (high-very high)</b>              |                        |                        |                                 |                        |                                 |                                   |
| - Total sun exposure                              | 1063 (20.1%)           | 220 (20.2%)            | 0.0% (-2.6%-2.6%)               | 1.0 (0.8-1.2)          | 0.97 (0.82-1.15)                | 0.72                              |
| - Recreational sun exposure                       | 1227 (23.3%)           | 215 (19.7%)            | 3.6% (0.9%-6.2%)                | 1.2 (1.0-1.5)          | 1.14 (0.96-1.35)                | 0.13                              |
| - Occupational sun exposure                       | 182 (3.5%)             | 57 (5.2%)              | -1.8% (-3.2% - -0.4%)           | 0.6 (0.5-0.9)          | 0.57 (0.37-0.71) *              | <0.001                            |
| <b>Tan in the last 12 months</b>                  | 4018 (76.1%)           | 750 (68.7%)            | 7.5% (4.5%-10.4%)               | 1.5 (1.3-1.7)          | 1.29 (1.11-1.49) *              | <0.001                            |
| <b>Sun protection (often-always)</b>              |                        |                        |                                 |                        |                                 |                                   |
| - Sunscreen use                                   | 2514 (47.6%)           | 395 (36.2%)            | 11.5% (8.3%-14.6%)              | 1.6 (1.4-1.8)          | 1.62 (1.41-1.86) *              | <0.001                            |
| - Long sleeve use                                 | 3336 (63.2%)           | 658 (60.3%)            | 3.0% (-0.2% - 6.1%)             | 1.1 (1.0-1.3)          | 1.14 (0.99-1.32)                | 0.07                              |
| - Hat use                                         | 1760 (33.4%)           | 372 (34.1%)            | -0.7% (-3.8%-2.4%)              | 1.0 (0.8-1.1)          | 1.14 (0.98-1.31)                | 0.08                              |
| - Shade use                                       | 1898 (36.0%)           | 465 (42.6%)            | -6.6% (-9.8% - -3.4%)           | 0.8 (0.7-0.9)          | 0.89 (0.78-1.02)                | 0.10                              |
| - Sunglasses use                                  | 3710 (70.3%)           | 734 (67.2%)            | 3.1% (0.0%-6.1%)                | 1.2 (1.0-1.3)          | 1.22 (1.06-1.41) *              | 0.007                             |
| <b>Sunscreen type</b>                             |                        |                        |                                 |                        |                                 |                                   |
| - Broad-spectrum                                  | 3616 (68.5%)           | 637 (58.3%)            | 10.2% (7.0%-13.4%)              | 1.6 (1.4-1.8)          | 2.23 (1.15-4.35) *              | <0.001                            |
| - SPF >30                                         | 4266 (80.8%)           | 786 (72.0%)            | 8.9% (6.0%-11.7%)               | 1.6 (1.4-1.9)          | 0.93 (0.74-1.17)                | 0.52                              |
| <b>Skin Check</b>                                 | 4372 (82.9%)           | 901 (82.5%)            | 0.3% (-2.1% - 2.8%)             | 1.0 (0.9-1.2)          | 1.20 (1.01-1.44) *              | 0.04                              |
| <b>Reaction</b>                                   |                        |                        |                                 |                        |                                 |                                   |
| - Family doctor visit                             | 1974 (37.4%)           | 493 (45.2%)            | -7.7% (-11.0%- -4.5%)           | 0.7 (0.6-0.8)          | 0.83 (0.73-0.96) *              | 0.009                             |
| - Check by friend/family member                   | 2559 (48.5%)           | 426 (39.0%)            | 9.5% (6.3%-12.7%)               | 1.5 (1.3-1.7)          | 1.31 (1.14-1.50) *              | <0.001                            |
| - Ignore                                          | 229 (4.3%)             | 58 (5.3%)              | -1.0% (-2.4% - 0.5%)            | 0.8 (0.6-1.1)          | 0.70 (0.52-0.95) *              | 0.002                             |
| <b>Worry if mole</b>                              |                        |                        |                                 |                        |                                 |                                   |
| - is irregular in shape                           | 5082 (96.3%)           | 1043 (95.5%)           | 0.8% (-0.5% - 2.1%)             | 1.2 (0.9-1.7)          | 1.66 (1.02-2.72) *              | 0.04                              |
| - changes colour                                  | 5158 (97.7%)           | 1056 (96.7%)           | 1.0% (0.0% - 2.2%)              | 1.5 (1.0-2.2)          | 2.32 (1.30-4.17) *              | 0.005                             |
| - grew in size                                    | 5150 (97.6%)           | 1065 (97.5%)           | 0.1% (-0.9% - 1.1%)             | 1.0 (0.6-1.6)          | 1.04 (0.55-1.95)                | 0.91                              |

\*Statistically significant

\*\*Percent difference between individuals with an annual income >50,000\$ and those with an annual income <50,000\$

+Gender and age-adjusted odds ratios

TABLE S7: DIFFERENCE IN PROPORTION BETWEEN POPULATIONS WITH DIFFERENT EDUCATION LEVELS.

| Variable (n,%)                                    | University Education<br>N=4244 | Non-University Education<br>N= 3466 | Difference<br>(95% CI, p-value) | Odds Ratio<br>(95% CI) | Adjusted Odds Ratio<br>(95% CI) | P-value of Adjusted<br>Odds Ratio |
|---------------------------------------------------|--------------------------------|-------------------------------------|---------------------------------|------------------------|---------------------------------|-----------------------------------|
| <b>Personal history of skin cancer</b>            | 578 (13.6%)                    | 506 (14.6%)                         | -1.0% (-2.5%-0.6%)              | 0.9 (0.8-1.1)          | 1.20 (1.04-1.37) *              | 0.01                              |
| - Melanoma                                        | 160 (27.7%)                    | 162 (32.0%)                         | -4.3% (-10.0%-1.1%)             | 0.8 (0.6-1.1)          |                                 |                                   |
| - Squamous Cell Carcinoma                         | 69 (11.9%)                     | 63 (12.5%)                          | -0.5% (-4.4%-3.4%)              | 1.0 (0.7-1.4)          |                                 |                                   |
| - Basal Cell Carcinoma                            | 290 (50.2%)                    | 230 (45.5%)                         | 4.7% (-1.2%- 10.7%)             | 1.2 (0.9-1.5)          |                                 |                                   |
| <b>Family history of skin cancer</b>              | 1382 (32.6%)                   | 1070 (30.8%)                        | 1.7% (-0.4%- 3.8%)              | 1.1 (1.0-1.2)          | 1.04 (0.94-1.14)                | 0.49                              |
| <b>Lifetime sunburns (more than 10)</b>           | 2922 (68.9%)                   | 2143 (61.8%)                        | 7.0% (4.9%-9.2%)                | 1.4 (1.2-1.5)          | 1.30 (1.17-1.44) *              | <0.001                            |
| <b>Lifetime blistering sunburns (more than 1)</b> | 3018 (71.1%)                   | 2448 (70.6%)                        | 0.5% (-1.6%-2.5%)               | 1.0 (0.9-1.1)          | 1.00 (0.90-1.11)                | 0.98                              |
| <b>Tanning bed use (more than 1)</b>              | 1911 (45.0%)                   | 1729 (49.9%)                        | -4.9% (-7.1%- -2.6%)            | 0.8 (0.8-0.9)          | 0.72 (0.66-0.80) *              | <0.001                            |
| <b>Sun exposure (high-very high)</b>              |                                |                                     |                                 |                        |                                 |                                   |
| - Total sun exposure                              | 828 (19.5%)                    | 757 (21.8%)                         | -2.3% (-4.2%- -0.5%)            | 0.9 (0.8-1.0)          | 0.86 (0.77-0.96) *              | 0.007                             |
| - Recreational sun exposure                       | 1051 (24.8%)                   | 694 (20.0%)                         | 4.7% (2.9%- 6.6%)               | 1.3 (1.2-1.5)          | 1.28 (1.15-1.43) *              | <0.001                            |
| - Occupational sun exposure                       | 107 (2.5%)                     | 168 (4.9%)                          | -2.3% (-3.2%- -1.5%)            | 0.5 (0.4-0.7)          | 0.47 (0.36-0.60) *              | <0.001                            |
| <b>Tan in the last 12 months</b>                  | 3160 (74.5%)                   | 2569 (74.1%)                        | 0.3% (-1.6%- 2.3%)              | 1.0 (0.9-1.1)          | 0.97 (0.88-1.08)                | 0.62                              |
| <b>Sun protection (often-always)</b>              |                                |                                     |                                 |                        |                                 |                                   |
| - Sunscreen use                                   | 2256 (53.2%)                   | 1329 (38.3%)                        | 14.8% (12.6%-17.0%)             | 1.8 (1.7-2.0)          | 1.85 (1.68-2.03) *              | <0.001                            |
| - Long sleeve use                                 | 2870 (67.2%)                   | 1930 (55.7%)                        | 11.9% (9.8%-14.1%)              | 1.7 (1.5-1.8)          | 1.78 (1.61-1.96) *              | <0.001                            |
| - Hat use                                         | 1583 (37.3%)                   | 1060 (30.6%)                        | 6.7% (4.6%-8.8%)                | 1.4 (1.2-1.5)          | 1.48 (1.34-1.63) *              | <0.001                            |
| - Shade use                                       | 1625 (38.3%)                   | 1303 (37.6%)                        | 0.7% (-1.5%-2.9%)               | 1.0 (0.9-1.1)          | 1.11 (1.01-1.22) *              | 0.03                              |
| - Sunglasses use                                  | 3040 (71.6%)                   | 2449 (70.7%)                        | 1.0% (-1.1%-3.0%)               | 1.0 (0.9-1.2)          | 1.07 (0.97-1.18)                | 0.21                              |
| <b>Sunscreen type</b>                             |                                |                                     |                                 |                        |                                 |                                   |
| - Broad-spectrum                                  | 3009 (70.9%)                   | 2140 (61.7%)                        | 9.2% (7.0%-11.3%)               | 1.5 (1.4-1.7)          | 1.63 (0.95-2.81)                | 0.08                              |
| - SPF >30                                         | 3560 (83.9%)                   | 2580 (74.4%)                        | 9.4% (7.6%-11.3%)               | 1.8 (1.6-2.0)          | 1.33 (1.14-1.54) *              | <0.001                            |
| <b>Skin check</b>                                 | 3565 (84.0%)                   | 2874 (82.9%)                        | 1.1% (-0.6%-2.8%)               | 1.1 (1.0-1.2)          | 1.15 (1.02-1.31) *              | 0.02                              |
| <b>Reaction</b>                                   |                                |                                     |                                 |                        |                                 |                                   |
| - Family doctor visit                             | 1578 (37.2%)                   | 1450 (41.8%)                        | -4.7% (-6.8%- -2.5%)            | 0.8 (0.7-0.9)          | 0.86 (0.78-0.94) *              | 0.002                             |
| - Check by friend/family member                   | 2046 (48.2%)                   | 1551 (44.8%)                        | 3.5% (1.2%-5.7%)                | 1.1 (1.0-1.3)          | 1.09 (0.99-1.19)                | 0.08                              |
| - Ignore                                          | 178 (4.2%)                     | 151 (4.4%)                          | -0.2% (-1.1%- 0.7%)             | 1.0 (0.8-1.2)          | 0.92 (0.74-1.15)                | 0.47                              |
| <b>Worry if mole</b>                              |                                |                                     |                                 |                        |                                 |                                   |
| - is irregular in shape                           | 4125 (97.2%)                   | 3307 (95.4%)                        | 1.8% (0.9%-2.6%)                | 1.7 (1.3-2.1)          | 2.34 (1.58-3.44) *              | <0.001                            |
| - changes colour                                  | 4157 (98.0%)                   | 3375 (97.4%)                        | 0.6% (-0.1%-1.5%)               | 1.3 (0.9-1.8)          | 1.66 (1.03-2.65) *              | 0.04                              |
| - grew in size                                    | 4150 (97.8%)                   | 3379 (97.5%)                        | 0.3% (-0.4%-1.0%)               | 1.1 (0.8-1.5)          | 1.13 (0.75-1.70)                | 0.57                              |

\*Statistically significant

\*\*Percent difference between individuals with a university education and those without

+Gender and age-adjusted odds ratios

TABLE S8: DIFFERENCE BETWEEN LGBTQ+ AND NON-LGBTQ+.

| Variable (n,%)                                    | LGBTQ+<br>N= 226 | NON-LGBTQ+<br>N= 7537 | Difference<br>(95% CI, p-value) | Odds Ratio<br>(95% CI) | Adjusted Odds Ratio<br>(95% CI) | P-value of Adjusted<br>Odds Ratio |
|---------------------------------------------------|------------------|-----------------------|---------------------------------|------------------------|---------------------------------|-----------------------------------|
| <b>Personal history of skin cancer</b>            | 27 (12.0%)       | 992 (13.2%)           | -1.2% (-5.5%-3.1%)              | 0.9 (0.6-1.4)          | 1.11 (0.73-1.69)                | 0.62                              |
| - Melanoma                                        | 11 (40.7%)       | 287 (28.9%)           | 11.8% (-6.9%-30.6%)             | 1.7 (0.7-3.9)          |                                 |                                   |
| - Squamous Cell Carcinoma                         | 5 (18.5%)        | 122 (12.3%)           | 6.2% (-8.6%-2.1%)               | 1.6 (0.5-4.5)          |                                 |                                   |
| - Basal Cell Carcinoma                            | 9 (33.3%)        | 477 (48.1%)           | -14.8% (-32.8%-3.3%)            | 0.5 (0.2-1.3)          |                                 |                                   |
| <b>Family history of skin cancer</b>              | 68 (30.1%)       | 2453 (32.6%)          | -2.5% (-8.5%-3.6%)              | 0.9 (0.7-1.2)          | 0.93 (0.69-1.25)                | 0.62                              |
| <b>Lifetime sunburns (more than 10)</b>           | 154 (68.1%)      | 4945 (65.6%)          | 2.5% (-3.6%-8.7%)               | 1.1 (0.8-1.5)          | 0.90 (0.66-1.22)                | 0.49                              |
| <b>Lifetime blistering sunburns (more than 1)</b> | 157 (69.5%)      | 5348 (71.0%)          | -1.5% (-7.6%-4.6%)              | 0.9 (0.7-1.3)          | 0.84 (0.62-1.14)                | 0.26                              |
| <b>Tanning bed use (more than 1)</b>              | 100 (44.3%)      | 3579 (47.5%)          | -3.2% (-9.8%-3.3%)              | 0.9 (0.7-1.2)          | 0.75 (0.56-1.00)                | 0.05                              |
| <b>Sun exposure (high-very high)</b>              |                  |                       |                                 |                        |                                 |                                   |
| - Total sun exposure                              | 49 (21.7%)       | 1544 (20.5%)          | 1.2% (-4.3%-6.6%)               | 1.1 (0.8-1.5)          | 1.03 (0.74-1.42)                | 0.87                              |
| - Recreational sun exposure                       | 53 (23.5%)       | 1704 (22.6%)          | 0.8% (-4.7%-6.4%)               | 1.0 (0.8-1.4)          | 0.97 (0.71-1.33)                | 0.84                              |
| - Occupational sun exposure                       | 15 (6.6%)        | 258 (3.4%)            | 3.2% (-0.1%-6.5%)               | 2.0 (1.1-3.4)          | 1.67 (0.96-2.90)                | 0.07                              |
| <b>Tan in the last 12 months</b>                  | 152 (67.3%)      | 5599 (74.3%)          | -7.0% (-13.2%- -0.8%)           | 0.7 (0.5-1.0)          | 0.63 (0.47-0.84) *              | 0.002                             |
| <b>Sun protection (always)</b>                    |                  |                       |                                 |                        |                                 |                                   |
| - Sunscreen use                                   | 87 (38.5%)       | 3521 (46.7%)          | -8.2% (-14.7%- -1.8%)           | 0.7 (0.5-0.9)          | 0.70 (0.53-0.93) *              | 0.01                              |
| - Long sleeve use                                 | 155 (68.6%)      | 4684 (62.2%)          | 6.4% (0.3%- 12.6%)              | 1.3 (1.0-1.8)          | 1.32 (0.98-1.79)                | 0.07                              |
| - Hat use                                         | 86 (38.1%)       | 2563 (34.0%)          | 4.0% (-2.4%-10.5%)              | 1.2 (0.9-1.6)          | 1.36 (1.03-1.81) *              | 0.03                              |
| - Shade use                                       | 82 (36.3%)       | 2859 (37.9%)          | -1.6% (-8.0%-4.7%)              | 0.9 (0.7-1.2)          | 1.09 (0.83-1.45)                | 0.53                              |
| - Sunglasses use                                  | 134 (59.3%)      | 5377 (71.3%)          | -12.0% (-18.5%- -5.6%)          | 0.6 (0.4-0.8)          | 0.62 (0.47-0.82) *              | <0.001                            |
| <b>Sunscreen type</b>                             |                  |                       |                                 |                        |                                 |                                   |
| - Broad-spectrum                                  | 149 (65.9%)      | 5017 (66.6%)          | -0.6% (-6.9%-5.6%)              | 1.0 (0.7-1.3)          | 1.36 (0.19-9.95)                | 0.76                              |
| - SPF >30                                         | 193 (85.4%)      | 5986 (79.4%)          | 6.0% (1.3%-10.7%)               | 1.5 (1.0-2.3)          | 1.90 (1.06-3.43) *              | 0.03                              |
| <b>Skin check</b>                                 | 177 (78.3%)      | 6303 (83.6%)          | -5.3% (-10.7%- 0.0%)            | 0.7 (0.5-1.0)          | 0.87 (0.62-1.22)                | 0.41                              |
| <b>Reaction</b>                                   |                  |                       |                                 |                        |                                 |                                   |
| - Family doctor visit                             | 77 (34.1%)       | 2973 (39.5%)          | -5.4% (-11.7%- 0.9%)            | 0.8 (0.6-1.1)          | 0.92 (0.69-1.22)                | 0.56                              |
| - Check by friend/family member                   | 121 (53.5%)      | 3502 (46.5%)          | 7.1% (0.5%-13.7%)               | 1.3 (1.0-1.7)          | 1.15 (0.88-1.51)                | 0.31                              |
| - Ignore                                          | 8 (3.5%)         | 323 (4.3%)            | -0.7% (-3.2%-1.7%)              | 0.8 (0.3-1.7)          | 0.70 (0.34-1.45)                | 0.34                              |
| <b>Worry if mole</b>                              |                  |                       |                                 |                        |                                 |                                   |
| - is irregular in shape                           | 219 (96.9%)      | 7261 (96.3%)          | 0.6% (-1.7%-2.9%)               | 1.2 (0.6-3.0)          | 4.73 (0.65-34.28)               | 0.12                              |
| - changes colour                                  | 223 (98.7%)      | 7359 (97.6%)          | 1.0% (-0.5%-2.6%)               | 1.8 (0.6-8.9)          | 1.8 (0.6-8.9)                   | 0.59                              |
| - grew in size                                    | 219 (96.9%)      | 7366 (97.7%)          | -0.8% (-3.1%-1.5%)              | 0.7 (0.3-1.9)          | 0.73 (0.26-2.03)                | 0.55                              |

\*Statistically significant  
\*\*Percent difference between LGBTQ+ and non-LGBTQ+ communities  
+Gender and age-adjusted odds ratios



TABLE S9: DIFFERENCE BETWEEN MEN AND WOMEN.

| Variable (n,%)                                    | Women<br>N=5648 | Men<br>N= 2202 | Difference<br>(95% CI, p-value) | Odds Ratio<br>(95% CI) | Adjusted Odds Ratio<br>(95% CI) | P-value of Adjusted<br>Odds Ratio |
|---------------------------------------------------|-----------------|----------------|---------------------------------|------------------------|---------------------------------|-----------------------------------|
| <b>Personal history of skin cancer</b>            | 667 (11.8%)     | 368 (16.7%)    | -4.9% (-6.7%- -3.1%)            | 0.7 (0.6-0.8)          | 0.78 (0.68-0.90) *              | <0.001                            |
| - Melanoma                                        | 185 (27.7%)     | 116 (31.5%)    | -3.8% (-9.6%-2.1%)              | 0.8 (0.6-1.1)          |                                 |                                   |
| - Squamous Cell Carcinoma                         | 84 (12.6%)      | 46 (12.5%)     | 0.1% (-4.1%-4.3%)               | 1.0 (0.7-1.5)          |                                 |                                   |
| - Basal Cell Carcinoma                            | 336 (50.4%)     | 157 (42.7%)    | 7.7% (1.4%-14.0%)               | 1.4 (1.0-1.8)          |                                 |                                   |
| <b>Family history of skin cancer</b>              | 1942 (34.4%)    | 603 (27.4%)    | 7.0% (4.8%-9.2%)                | 1.4 (1.2-1.6)          | 1.33 (1.19-1.49) *              | <0.001                            |
| <b>Lifetime sunburns (more than 10)</b>           | 3614 (64.0%)    | 1534 (69.7%)   | -5.7% (-8.0%- -3.4%)            | 0.8 (0.7-0.9)          | 0.65 (0.58-0.73) *              | <0.001                            |
| <b>Lifetime blistering sunburns (more than 1)</b> | 4039 (71.5%)    | 1527 (69.4%)   | 2.2% (-0.1%-4.4%)               | 1.1 (1.0-1.2)          | 1.08 (0.97-1.22)                | 0.17                              |
| <b>Tanning bed use (more than 1)</b>              | 3056 (54.1%)    | 657 (29.8%)    | 24.3% (22.0%-26.6%)             | 2.8 (2.5-3.1)          | 2.50 (2.25-2.79) *              | <0.001                            |
| <b>Sun exposure (high-very high)</b>              |                 |                |                                 |                        |                                 |                                   |
| - Total sun exposure                              | 1120 (19.8%)    | 489 (22.1%)    | -2.4% (-4.4%- -0.4%)            | 0.9 (0.8-1.0)          | 0.86 (0.76-0.97) *              | 0.01                              |
| - Recreational sun exposure                       | 1153 (20.4%)    | 623 (28.3%)    | -7.9% (-10.0%- -5.7%)           | 0.7 (0.6-0.7)          | 0.63 (0.56-0.71) *              | <0.001                            |
| - Occupational sun exposure                       | 104 (1.8%)      | 174 (7.9%)     | -6.1% (-7.2%- -4.9%)            | 0.2 (0.2-0.3)          | 0.21 (0.16-0.27) *              | <0.001                            |
| <b>Tan in the last 12 months</b>                  | 4132 (73.2%)    | 1679 (76.3%)   | -3.1% (-5.2%- -1.0%)            | 0.8 (0.8-1.0)          | 0.77 (0.69-0.87) *              | <0.001                            |
| <b>Sun protection (always)</b>                    |                 |                |                                 |                        |                                 |                                   |
| - Sunscreen use                                   | 2904 (51.4%)    | 740 (33.6%)    | 17.8% (15.4%-20.2%)             | 2.1 (1.9-2.3)          | 2.01 (1.81-2.23) *              | <0.001                            |
| - Long sleeve use                                 | 3086 (54.6%)    | 1812 (82.3%)   | -27.7% (-29.7%- -25.6%)         | 0.3 (0.2-0.3)          | 0.27 (0.24-0.31) *              | <0.001                            |
| - Hat use                                         | 1728 (30.6%)    | 962 (43.7%)    | -13.1% (-15.5%- -10.7%)         | 0.6 (0.5-0.6)          | 0.63 (0.57-0.70) *              | <0.001                            |
| - Shade use                                       | 2247 (39.8%)    | 729 (33.1%)    | 6.7% (4.3%-9.0%)                | 1.3 (1.2-1.5)          | 1.47 (1.32-1.64) *              | <0.001                            |
| - Sunglasses use                                  | 4190 (74.2%)    | 1386 (62.9%)   | 11.2% (8.9%- 13.6%)             | 1.7 (1.5-1.9)          | 1.70 (1.53-1.89) *              | <0.001                            |
| <b>Sunscreen type</b>                             |                 |                |                                 |                        |                                 |                                   |
| - Broad-spectrum                                  | 3888 (68.8%)    | 1336 (60.7%)   | 8.2% (5.8%-10.5%)               | 1.4 (1.3-1.6)          | 0.76 (0.40-1.46)                | 0.42                              |
| - SPF >30                                         | 4590 (81.3%)    | 1652 (75.0%)   | 6.2% (4.2%-8.3%)                | 1.4 (1.3-1.6)          | 0.85 (0.71-1.01)                | 0.07                              |
| <b>Skin check</b>                                 | 4822 (85.4%)    | 1735 (78.8%)   | 6.6% (4.6%-8.5%)                | 1.6 (1.4-1.8)          | 1.70 (1.49-1.93) *              | <0.001                            |
| <b>Reaction</b>                                   |                 |                |                                 |                        |                                 |                                   |
| - Family doctor visit                             | 2371 (42.0%)    | 723 (32.8%)    | 9.1% (6.8%-11.5%)               | 1.5 (1.3-1.6)          | 1.68 (1.51-1.87) *              | <0.001                            |
| - Check by friend/family member                   | 2413 (42.7%)    | 1239 (56.3%)   | -13.5% (-16.0%- -11.1%)         | 0.6 (0.5-0.6)          | 0.56 (0.51-0.62) *              | <0.001                            |
| - Ignore                                          | 221 (3.9%)      | 113 (5.1%)     | -1.2% (-2.3%- -0.2%)            | 0.8 (0.6-1.0)          | 0.73 (0.58-0.93) *              | 0.009                             |
| <b>Worry if mole</b>                              |                 |                |                                 |                        |                                 |                                   |
| - is irregular in shape                           | 5517 (97.7%)    | 2042 (92.7%)   | 4.9% (3.8%-6.1%)                | 3.3 (2.6-4.2)          | 3.76 (2.61-5.42) *              | <0.001                            |
| - changes colour                                  | 5554 (98.3%)    | 2110 (95.8%)   | 2.5% (1.6%- 3.4%)               | 2.6 (1.9-3.5)          | 2.37 (1.50-3.75) *              | <0.001                            |
| - grew in size                                    | 5532 (98.0%)    | 2133 (96.9%)   | 1.1% (0.3%-1.9%)                | 1.5 (1.1-2.1)          | 1.30 (0.84-2.01)                | 0.24                              |

\*Statistically significant  
\*\*Percent difference between men and women  
+Gender and age-adjusted odds ratios
